# Supplementary material
Source: MDPI journal article supplement (https://www.mdpi.com/2306-5710/6/4/58)
Supplement: s1 [file s1]

## Sheet: Tables
Tables
Table 1.	Fermentation results for Z. flo OTA strain in 9 °P wort in 100 mL-scale and in 8 °P wort in 2L-scale. Stats…
		100 ml 15 °C	100 ml 25 °C	2 L 20 °C		100 at 15C			100 at 25C						2L-scale	Sample name	Z. flo 7	Z. flo 8
	ABV%	3.73 ± 0.01	3.53 ± 0.04	3.5 ± 0.01		3.72	3.74		3.55	3.5		0.0480761				ABV %	3.51	3.49
	°Plato	1.28 ± 0.05	1.69 ± 0.12	1.41 ± 0.02		1.314	1.247	0.047	1.613	1.775	-0.112	0.0864909	10.021	10.438		°Plato	1.396	1.429
	pH	4.41 ± 0.04	4.44 ± 0.21	4.33 ± 0.11		4.43	4.38		4.59	4.29		0.854438				pH Value	4.41	4.25
	Attenuation%	84.6 ± 0.4	79.6 ± 1.4	82.3 ± 0.3		0.842635	0.850659		0.806826	0.787425		0.0864909				Attenuation %	0.828501	0.825156
Table 2.	Results after 2L-scale fermentations in 12 °P wort at 20 °C. Results are means of two independent fermentations.
		Z. flo OTA	Z. flo C199	A62				Z. flo OTA		Z. flo C199		A62
	ABV%	5.03 ± 0.07	5.38 ± 0.02	5.55 ± 0.06			ABV%	5.08	4.98	5.39	5.36	5.51	5.59
	°Plato	2.71 ± 0.15	2.12 ± 0.03	1.77 ± 0.12			°Plato	2.602	2.817	2.101	2.139	1.858	1.682
	pH	4.24 ± 0.01	4.27 ± 0.01	4.14 ± 0.01			pH	4.23	4.24	4.26	4.27	4.15	4.13
	Attenuation%	77.3 ± 0.9	82.3 ± 0.23	85.2 ± 0.7			Attenuation%	78.2266	76.4213	82.4127	82.0922	84.4551	85.9283
	Viability%	86.1 ± 1.4	71.0 ± 0.7	92.0 ± 3.3			Viability%	0.850437	0.870761	0.705095	0.714433	0.9436	0.896377
	(mg/L)	Z. flo OTA	Z. flo C199	A62	Threshold*			Zf OTA	Zf OTA	C199	C199	A62	A62
	Acetaldehyde	13 ± 1	5.6 ± 0.2	11.7 ± 1	25 mg/L		Acetaldehyde	12.29	13.73	5.51	5.77	11	12.42
	Propanol	12.6 ± 0.7	14 ± 0.1	17.9 ± 0.3	800 mg/L		Propanol	13.0465	12.0696	13.8923	14.0437	17.7093	18.1744
	2-methylbutanol	9.8 ± 0.4	7.3 ± 0	14.2 ± 0.2	65 mg/L		2-methylbutanol	10.0779	9.55816	7.36824	7.30485	14.2752	14.0502
	3-methylbutanol	37.8 ± 0.9	37 ± 0.1	45.4 ± 0.5	70 mg/L		3-methylbutanol	38.4008	37.1387	36.9862	37.0856	45.7346	45.0395
	2-methylpropanol	20.3 ± 0.7	15.9 ± 0.1	18.2 ± 0.1			2-methylpropanol	20.8039	19.8008	15.9973	15.8744	18.1043	18.2562
	2-phenylethanol	9.9 ± 0.7	7.2 ± 0.3	8.4 ± 0.5	125 mg/L		2-phenylethanol	10.3979	9.3782	7.388	6.97451	8.73663	8.00766
	3-methylbutyl acetate	0 ± 0	0 ± 0	0.8 ± 0	1.6 mg/L		3-methylbutyl acetate	0.02695	0.02442	0.02042	0.020705	0.801775	0.752415
	2-phenylethyl acetate	2.1 ± 0.3	0.8 ± 0.1	0.2 ± 0	3.8 mg/L		2-phenylethyl acetate	2.2967	1.88908	0.8699	0.74276	0.209735	0.159755
	Ethyl acetate	22.8 ± 0.5	13.8 ± 0.1	31.4 ± 0.2	33 mg/L		Ethyl acetate	22.4277	23.1368	13.8361	13.6713	31.5543	31.3083
	Ethyl hexanoate	0.05 ± 0	0.08 ± 0	0.58 ± 0.04	0.23 mg/L		Ethyl hexanoate	0.05075	0.049635	0.076775	0.07844	0.602645	0.550775
	Ethyl octanoate	0 ± 0	0.1 ± 0	0.3 ± 0	0.9 mg/L		Ethyl octanoate	0.048495	0.04095	0.09144	0.085055	0.306055	0.253555
	Ethyl decanoate	0.1 ± 0	0.1 ± 0	0 ± 0	1.5 mg/L		Ethyl decanoate	0.08436	0.036	0.08077	0.0521	0.042575	0.01808
Table 3.	10L-scale fermentation results. Green beer values are means of duplicate-fermentations; prior to bottling, duplicates were combined and the results are means of technical replicates.
		WLP380	Zf OTA	WLP380 Bottled	Zf OTA bottled
		Green beer	Green beer						WLP380		Zf OTA
	ABV%	4.52 ± 0.04	4.77 ± 0.04						4.47	4.56	4.81	4.72
	°Plato	3.30 ± 0.07	3.09 ± 0.1						3.38	3.28	3.026	3.161
	pH	4.62 ± 0.00	4.25 ± 0.00						4.6	4.64	4.25	4.25
	Attenuation%	71.8 ± 0.6	74.1 ± 0.8						71.4006	72.2865	74.6622	73.5264
	Residual maltotriose g/L	10.8 ± 0.6	7.4 ± 0.5						11.215	10.423	6.978	7.735
	mg/L					Threshold*			WLP380		Zf OTA
	Acetaldehyde	1.36 ± 0.23	8.02 ± 0.26	2020-11-04	2020-06-01	25 mg/L		Acetaldehyde	1.19767	1.51998	8.20528	7.83574
	Propanol	15.29 ± 1.11	12.43 ± 0.15	15.43	2020-10-09	800 mg/L		Propanol	14.5063	16.0731	12.3237	12.5384
	2-methylbutanol	17.43 ± 1.11	7.9 ± 0.06	17.70	2028-06-01	65 mg/L		2-methylbutanol	16.6465	18.2192	7.94032	7.85272
	3-methylbutanol	48.71 ± 3.24	35.65 ± 0.29	49.51	27.98	70 mg/L		3-methylbutanol	46.4173	51.001	35.4426	35.8553
	2-methylpropanol	41.07 ± 3.07	17.58 ± 0.08	41.51	13.31			2-methylpropanol	38.9029	43.2453	17.6392	17.5246
	2-phenylethanol	15.36 ± 0.9	6.17 ± 0.19	16.40	2020-10-05	125 mg/L		2-phenylethanol	14.7256	16.0036	6.30805	6.03979
	3-methylbutyl acetate	5 ± 0.3	0.02 ± 0	1940-04-01	0.02	1.6 mg/L		3-methylbutyl acetate	4.7804	5.21016	0.0163	0.016095
	2-phenylethyl acetate	1.1 ± 0.02	1.16 ± 0.06	2027-01-01	2015-01-01	3.8 mg/L		2-phenylethyl acetate	1.08465	1.11897	1.1143	1.19857
	Ethyl acetate	45.84 ± 3.44	17.76 ± 0.51	44.25	13.40	33 mg/L		Ethyl acetate	43.4105	48.2762	17.3925	18.1208
	Ethyl hexanoate	0.14 ± 0	0.08 ± 0	0.15	0.06	0.23 mg/L		Ethyl hexanoate	0.143515	0.144675	0.08173	0.080505
	Ethyl octanoate	0.46 ± 0	0.05 ± 0	0.60	0.05	0.9 mg/L		Ethyl octanoate	0.456525	0.463125	0.052915	0.053915
	Ethyl decanoate	0.13 ± 0.01	0.03 ± 0	0.23	0.09	1.5 mg/L		Ethyldecanoate	0.13115	0.122765	0.029865	0.03255

## Sheet: Figures
Figures
																		Average % attenuation
Fig 1										NKA = Apparent Attenuation													Range
										hrs	S. cer A-62		Z. flo C199		Z. flo OTANIEMI				S. cer A-62	Z. flo C199	Z. flo OTA		S. cer A-63	Z. flo C200	Z. flo OTANIEMI
										0	0	0	0	0	0	0		0	0	0	0		0	0	0
										1.75	0.889037	0.760846	0.80491	0.740818	0.0260208	0.0540439		1.75	0.824942	0.772864	0.0400324		0.0906446	0.0453203	0.0198153
										26.75	22.4494	20.5115	23.8512	22.5187	13.9182	14.4144		26.75	21.4804	23.185	14.1663		1.37029	0.942216	0.350899
										50.75	34.203	31.7718	56.5425	53.3342	22.9879	23.3491		50.75	32.9874	54.9383	23.1685		1.7191	2.26858	0.25539
										78.75	43.3342	40.579	76.1235	75.1136	38.187	37.3405		78.75	41.9566	75.6186	37.7638		1.94825	0.714112	0.598589
										117.75	54.4885	52.1893	86.0076	80.3842	63.4969	58.9922		117.75	53.3389	80.3842	61.2445		1.62579	#DIV/0!	3.18527
										146.75	61.9789	59.9688	82.1371	81.7077	73.9707	70.3297		146.75	60.9738	81.9224	72.1502		1.42133	0.303611	2.57458
										167.75	67.0958	65.812	82.4127	82.0922	76.5894	73.9622		167.75	66.4539	82.2525	75.2758		0.907743	0.226631	1.85772
										194.75	73.338	72.7311			78.0732	75.7641		194.75	73.0346		76.9187		0.429135		1.63278
										219.75	77.6771	77.6175			78.2521	76.2554		219.75	77.6473		77.2538		0.0421592		1.41192
										290.25	84.4551	85.9283			78.2266	76.4213		290.25	85.1917		77.324		1.04175		1.27651
Fig 2																Zf OTA	Maltotriose	Maltose	Glucose	Fructose	Glycerol	Ethanol		Range	Maltotriose	Maltose	Glucose	Fructose	Glycerol	Ethanol
																1.75	13.437	51.4	14.192	3.049	0.231	0		1.75	3.64443	13.9406	3.85727	0.773575	0.163342	0		0.601994
																26.75	13.113	50.0955	1.3795	0.826	0.5035	9.9665		26.75	0.162635	0.828022	0.262337	1.16814	0.712057	0.287792
																50.75	13.084	43.7435	0	0	0	16.2855		50.75	0.106066	0.324562	0	0	0	0.000707107
																78.75	13.0295	30.4655	0	0.4485	2.311	26.7725		78.75	0.123744	0.917117	0	0.00212132	0.172534	0.249609
																117.75	11.8305	5.12	0	0	0	43.855		117.75	0.228395	7.24077	0	0	0	1.72958
																146.75	9.2535	0.664	0	0	0	50.669		146.75	1.18299	0.939038	0	0	0	1.85686
																167.75	7.1735	0	0	0.55	3.849	52.7435		167.75	1.40926	0	0	0.00848528	0.526087	1.78403
																194.75	5.821	0	0	0	0	53.3055		194.75	1.45805	0	0	0	0	0.73327
																219.75	5.519	0	0	0.284	1.813	53.5635		219.75	1.20774	0	0	0.401637	2.56397	1.0543
																290.25	5.348	0	0	0.2745	1.753	53.81		290.25	1.07763	0	0	0.388202	2.47912	1.4326
																C199	Maltotriose	Maltose	Glucose	Fructose	Glycerol	Ethanol		Range	Maltotriose	Maltose	Glucose	Fructose	Glycerol	Ethanol
																1.75	13.151	49.9795	13.839	3.0845	0.3995	1.0815		1.75	0.0579828	0.108187	0.0509117	0.0148492	0.564978	0.0572756		0.892275
																26.75	11.9475	40.774	0	0.476	0.6995	15.11		26.75	0.762968	3.50018	0	0.125865	0.989242	0.237588
																50.75	12.159	14.995	0	0.437	2.5445	38.2565		50.75	0.195161	2.03505	0	0.00282843	0.287792	0.689429
																78.75	7.9405	0.2595	0	0.373	2.937	50.1535		78.75	0.249609	0.0799031	0	0.0947523	0.715592	4.80762
																117.75	4.0845	0.135	0	0.1785	3.0255	56.931		117.75	0.334462	0.190919	0	0.00494975	0.16617	0.749533
																146.75	1.6565	0	0	0.087	1.5625	58.208		146.75	2.34264	0	0	0.123037	2.20971	2.00677
																167.75	1.4475	0	0	0.0305	1.5025	57.128		167.75	1.85545	0.21991	0	0.121622	2.63751	0.321026
																A62	Maltotriose	Maltose	Glucose	Fructose	Glycerol	Ethanol		Range	Maltotriose	Maltose	Glucose	Fructose	Glycerol	Ethanol
																0	13.2463	50.453	13.9567	3.07267	0	0		0	0	0	0	0	0	0
																26.75	10.842	40.9575	1.8855	1.774	0.4135	14.042		26.75	0.452548	1.82363	0.120915	0.0622254	0.584777	1.47361
																50.75	10.4135	39.351	0	0	0	23.2895		50.75	0.292035	1.09602	0	0	0	1.2141
																78.75	8.237	33.3375	0.168	0.1985	0.6865	29.32		78.75	0.429921	1.82221	0.237588	0.280721	0.970858	0.767918
																117.75	5.4625	27.054	0.4435	0.478	2.019	37.639		117.75	0.183141	1.34916	0.0120208	0.0947523	0.285671	0.643467
																146.75	0	21.794	0.435	0.542	2.907	43.064		146.75
																167.75	0	19.002	0.1795	0.217	1.092	47.0445		167.75	0	0.841457	0.253851	0.306884	1.54432	0.253851
																194.75	0	13.4435	0.1465	0.281	1.5805	50.497		194.75	0	0.40093	0.207182	0.397394	2.23516	0.294156
																219.75	0	9.637	0	0	0.3825	53.178		219.75	0	0.345068	0	0	0.540937	1.89787
																290.25	0	0	0	0.5655	2.6515	61.5765		290.25	0	0.608112	0	0.0799031	0.0190919	0.19304
Fig 3
																				NKA = Apparent Attenuation							Average % attenuation				Range
																					hrs	WLP380		Z. florentina				WLP380	Z. flo OTA			WLP381	Z. flo OTA
																					1	0	0	0	0		1	0	0		1	0	0
																					21.5	19.8548	20.5418	4.6656	4.89346		21.5	20.1983	4.77953		21.5	0.485802	0.161124
																					35	69.0223	69.2178	16.3684	16.3299		35	69.12	16.3492		35	0.138235	0.0272088
																					102	70.7623	71.4154	37.8168	36.1987		102	71.0889	37.0078		102	0.461851	1.14416
																					120.5	70.9508	71.7022	47.2231	45.3529		120.5	71.3265	46.288		120.5	0.53133	1.32239
																					147	71.2228	72.1602	60.3319	57.9005		147	71.6915	59.1162		147	0.662846	1.71927
																					174	71.3942	72.2373	70.462	68.5863		174	71.8157	69.5241		174	0.596145	1.3263
																					192	71.4006	72.2865	72.9244	71.6245		192	71.8436	72.2745		192	0.626419	0.919179
																					213			74.6622	73.5264		213		74.0943		213		0.803082
																				Average dry mass g/l								Range dry mass g/l
																					WLP380	Z. florentina							WLP380	Z. florentina
																				1	0.000748282	0.000478916						1	2.36529e-05	3.78103e-05
																				21.5	2.49737	0.990584						21.5	0.0469837	0.0399833
																				35	3.81685	1.38765						35	0.00515513	0.02462
																				102	1.57169	1.7088						102	0.0293383	0.0718942
																				120.5	1.29629	1.7269						120.5	0.0577072	0.0410065
																				147	0.828163	1.75581						147	0.0569016	0.0556951
																				174	0.812362	1.83981						174	0.0856023	0.0899046
																				192	0.748479	1.26289						192	0.0793759	0.0176347
																				213		1.76096						213		0.072797
																				pH of juice						Average pH of wort				range pH of wort
																					WLP380		Z. florentina			hrs
																				hrs	3	4	5	6			WLP380	Z. florentina		0	WLP380	Z. florentina
																				1	5.24	5.19	5.19	5.19		1	5.215	5.19		1	0.025	0
																				21.5	4.77	4.72	4.92	4.95		21.5	4.745	4.935		21.5	0.025	0.015
																				35	4.41	4.45	4.64	4.64		35	4.43	4.64		35	0.02	0
																				102	5.25	4.59	4.47	4.48		102	4.59	4.475		102	0	0.005
																				120.5	4.62	4.62	4.4	4.4		120.5	4.62	4.4		120.5	0	0
																				147	4.61	4.62	4.31	4.31		147	4.615	4.31		147	0.005	0
																				174	4.64	4.65	4.31	4.3		174	4.645	4.305		174	0.005	0.005
																				192	4.6	4.64	4.28	4.26		192	4.62	4.27		192	0.02	0.01
																				213			4.25	4.25		213		4.25		213	0	0
Fig 5																			0	18.6667	23.6667	47.5	68.3333	92	115.75	144.75	165.5	187.167	209.5	263.5	287.25	312	334	358.5	425	499	593.5	676	767
																	0.04	A15	0	0.386	0.58	1.193	1.508	1.751	1.915	2.038	2.104	2.158	2.204	2.278	2.306	2.334	2.358	2.387	2.436	2.484	2.539	2.567	2.616
																			0	0.374	0.547	1.111	1.432	1.686	1.859	1.992	2.064	2.116	2.154	2.227	2.256	2.285	2.308	2.335	2.389	2.438	2.496	2.527	2.576
																		Z flo	0	0.111	0.202	0.343	0.388	0.427	0.469	0.522	0.553	0.586	0.616	0.685	0.719	0.756	0.79	0.836	0.979	1.233	1.532	1.728	1.902
																			0	0.197	0.261	0.381	0.443	0.498	0.549	0.603	0.638	0.672	0.703	0.768	0.8	0.831	0.858	0.888	0.955	1.075	1.349	1.585	1.787
																	0.02	A15	0	0.506	0.726	1.334	1.64	1.869	2.01	2.104	2.151	2.189	2.215	2.281	2.302	2.322	2.338	2.358	2.388	2.423	2.467	2.489	2.531
																			0	0.569	0.794	1.408	1.7	1.897	2.017	2.115	2.166	2.21	2.242	2.312	2.339	2.369	2.392	2.419	2.466	2.509	2.557	2.578	2.621
																		Z flo	0	0.256	0.305	0.489	0.607	0.727	0.839	0.962	1.038	1.113	1.178	1.307	1.359	1.408	1.452	1.502	1.628	1.832	2.047	2.139	2.225
																			0	0.195	0.257	0.402	0.493	0.587	0.68	0.777	0.839	0.9	0.955	1.074	1.121	1.169	1.21	1.258	1.381	1.584	1.871	2.039	2.153
																	0	A15	0	0.482	0.688	1.359	1.696	1.895	2.032	2.127	2.177	2.219	2.252	2.323	2.351	2.379	2.406	2.434	2.483	2.529	2.583	2.606	2.656
																		Z flo	0	0.227	0.292	0.506	0.674	0.842	1.003	1.171	1.282	1.381	1.475	1.651	1.721	1.78	1.829	1.886	2.008	2.134	2.248	2.302	2.369
																			0	0.159	0.222	0.394	0.517	0.637	0.757	0.889	0.978	1.067	1.148	1.317	1.386	1.454	1.51	1.574	1.724	1.933	2.133	2.226	2.311
																		Average	0	18.6667	23.6667	47.5	68.3333	92	115.75	144.75	165.5	187.167	209.5	263.5	287.25	312	334	358.5	425	499	593.5	676	767
																	0.04	A15	0	0.38	0.5635	1.152	1.47	1.7185	1.887	2.015	2.084	2.137	2.179	2.2525	2.281	2.3095	2.333	2.361	2.4125	2.461	2.5175	2.547	2.596
																		Z flo	0	0.154	0.2315	0.362	0.4155	0.4625	0.509	0.5625	0.5955	0.629	0.6595	0.7265	0.7595	0.7935	0.824	0.862	0.967	1.154	1.4405	1.6565	1.8445
																	0.02	A15	0	0.5375	0.76	1.371	1.67	1.883	2.0135	2.1095	2.1585	2.1995	2.2285	2.2965	2.3205	2.3455	2.365	2.3885	2.427	2.466	2.512	2.5335	2.576
																		Z flo	0	0.2255	0.281	0.4455	0.55	0.657	0.7595	0.8695	0.9385	1.0065	1.0665	1.1905	1.24	1.2885	1.331	1.38	1.5045	1.708	1.959	2.089	2.189
																	0	A15	0	0.482	0.688	1.359	1.696	1.895	2.032	2.127	2.177	2.219	2.252	2.323	2.351	2.379	2.406	2.434	2.483	2.529	2.583	2.606	2.656
																		Z flo	0	0.193	0.257	0.45	0.5955	0.7395	0.88	1.03	1.13	1.224	1.3115	1.484	1.5535	1.617	1.6695	1.73	1.866	2.0335	2.1905	2.264	2.34
																		Range	0	18.6667	23.6667	47.5	68.3333	92	115.75	144.75	165.5	187.167	209.5	263.5	287.25	312	334	358.5	425	499	593.5	676	767
																	0.04	A15	0	0.00848528	0.0233345	0.0579828	0.0537401	0.0459619	0.039598	0.0325269	0.0282843	0.0296985	0.0353553	0.0360624	0.0353553	0.0346482	0.0353553	0.0367696	0.033234	0.0325269	0.0304056	0.0282843	0.0282843
																		Zf OTA	0	0.0608112	0.0417193	0.0268701	0.0388909	0.0502046	0.0565685	0.0572756	0.0601041	0.0608112	0.0615183	0.0586899	0.0572756	0.053033	0.0480833	0.0367696	0.0169706	0.111723	0.129401	0.101116	0.0813173
																	0.02	A15	0	0.0445477	0.0480833	0.0523259	0.0424264	0.019799	0.00494975	0.00777817	0.0106066	0.0148492	0.0190919	0.0219203	0.026163	0.033234	0.0381838	0.0431335	0.0551543	0.0608112	0.0636396	0.0629325	0.0636396
																		Zf OTA	0	0.0431335	0.0339411	0.0615183	0.0806102	0.0989949	0.11243	0.130815	0.140714	0.150614	0.157685	0.164756	0.168291	0.168999	0.17112	0.172534	0.174655	0.175362	0.124451	0.0707107	0.0509117
																	0	A15	0	0	0	0	0	0	0	0	0	0	0	0	0	0	0	0	0	0	0	0	0	* No duplicate
																		Zf OTA	0	0.0480833	0.0494975	0.079196	0.111016	0.144957	0.173948	0.199404	0.21496	0.222032	0.231224	0.236174	0.236881	0.230517	0.225567	0.220617	0.200818	0.142128	0.0813173	0.0537401	0.0410122
																												2020-06-25										tropical fruity								fruity
Fig 4																												Hefestamm	Typ	Datum	Probennr.	Verkoster	SMELL	TASTE	REZENZ	MOUTHFEEL	BITTERNESS	Banana (green)	Banana (ripe)	Pineapple	Passionfruit	Peach	Mango	Melon		Berry	Strawberry	Red currant	Apple (green)
																												Probennummer 706282				Taster 1	5	4	5	5	5	0	3	0	0	0	0	0	0	2	0	0	0
																												A20000119: WLP 380				Taster 2	5	5	5	5	5	0	4	1	0	0	1	0	0	3	0	0	0
																																Taster 3	5	4	5	5	5	0	4	0	0	0	0	0	0	0	0	0	0
																																Taster 4	5	5	5	5	5	0	2	0	0	0	1	0	0	0	0	0	0
																																Taster 5	5	5	5	5	5	0	4	0	0	0	0	0	0	0	0	0	1
																																Taster 6	5	5	5	5	5	0	3	0	0	0	0	0	0	0	0	0	2
																																Taster 7	5	4	4	5	5	0	4	0	0	2	0	0	0	0	0	0	3
																												Mittelwert					5	4.57143	4.85714	5	5	0	3.42857	0.142857	0	0.285714	0.285714	0	4.14286	0.714286	0	0	0.857143
																												Probennummer 706281				Taster 1	4	4	5	5	4	0	0	2	0	0	0	0	0	2	0	4	0
																												A20000119: Z.f 4,8%				Taster 2	4	4	5	5	4	1	0	0	0	1	0	0	0	0	0	0	0
																																Taster 3	4	3	5	5	5	0	0	4	0	0	0	0	0	0	0	2	0
																																Taster 4	4	4	3	4	3	2	0	1	0	2	0	1	0	0	0	0	0
																																Taster 5	5	5	5	5	4	0	0	4	0	0	0	0	0	1	0	3	0
																																Taster 6	5	5	5	5	5	0	0	2	0	4	0	0	0	0	0	3	0
																																Taster 7	4	4	4	4	3	0	0	1	0	2	0	0	0	0	0	2	0
																																0
																												Mittelwert					4.28571	4.14286	4.57143	4.71429	4	0.428571	0	2	0	1.5	0	0.142857	4.07143	0.428571	0	2	0
																													tropical fruity								fruity							citrus
																													Banana (green)	Banana (ripe)	Pineapple	Passionfruit	Peach	Mango	Melon		Berry	Strawberry	Red currant	Apple (green)	Apple (ripe)	Plum		Orange	Tangerine	Lemon	Grapefruit	Lime
																												WLP 380 (706282)	0	3.42857	0.142857	0	0.285714	0.285714	0	4.14286	0.714286	0	0	0.857143	0.142857	0.142857	1.85714	0	0.142857	0	0	0	0.142857
																												Z.f 4,8% (706281)	0.428571	0	2	0	1.5	0	0.142857	4.07143	0.428571	0	2	0	0	0.428571	2.85714	0.285714	0	0.142857	0.428571	0.285714	1.14286
																													tropical fruity (ripe banana)	fruity (green apple)	citrus (tangerine)	spicy (clove)	sweet (wortlike, sweet, toffee)	floral (floral)	other (yeasty)
																												main flavor	4.14286	1.85714	0.142857	3.28571	2.85714	0.571429	2.14286
																												(main aroma attribute)	3.43	0.86	0.14	2.71	0.71	0.57	1.29
																													tropical fruity (pineapple)	fruity (red currant)	citrus (grapefruit)	spicy (clove)	sweet (wortlike, sweet)	floral (floral)	other (vinous)
																												main flavor	4.07143	2.85714	1.14286	0.142857	0.142857	0.714286	3
																												(main aroma attribute)	2	2	0.428571	0.142857	0.142857	0.428571	1.71429
Fig 6
[truncated: 40 more columns]

## Sheet: Fig 6 - BioScreen
OTA				Origin		Why
Zygotorulaspora florentina				Oak bark, Otaniemi		Interesting strain
Time	Time hr	IBU			Benzoate			EtOH			Sulphite			Sorbate			Reference
00:02:18	0	0.087	0.087	0.09	0.085	0.088	0.087	0.089	0.088	0.09	0.083	0.081	0.085	0.088	0.089	0.098	0.087	0.088	0.094
00:30:06	0.5	0.087	0.087	0.088	0.084	0.087	0.086	0.087	0.087	0.088	0.082	0.081	0.083	0.086	0.088	0.089	0.086	0.087	0.093
01:00:06	1	0.087	0.086	0.088	0.084	0.087	0.086	0.087	0.087	0.087	0.082	0.081	0.083	0.086	0.088	0.089	0.086	0.087	0.093
01:30:06	1.5	0.087	0.086	0.088	0.084	0.087	0.086	0.087	0.087	0.088	0.082	0.081	0.083	0.087	0.088	0.089	0.086	0.087	0.093
02:00:06	2	0.087	0.087	0.089	0.084	0.087	0.086	0.087	0.087	0.089	0.082	0.081	0.083	0.086	0.088	0.089	0.085	0.087	0.093
02:30:06	2.5	0.087	0.087	0.089	0.084	0.087	0.086	0.087	0.088	0.089	0.082	0.081	0.083	0.086	0.089	0.089	0.085	0.087	0.093
03:00:06	3	0.087	0.087	0.089	0.085	0.088	0.087	0.087	0.088	0.089	0.082	0.081	0.083	0.086	0.088	0.09	0.085	0.087	0.093
03:30:06	3.5	0.087	0.087	0.089	0.084	0.088	0.086	0.087	0.087	0.088	0.082	0.081	0.082	0.086	0.088	0.09	0.085	0.087	0.093
04:00:06	4	0.088	0.087	0.089	0.085	0.088	0.087	0.087	0.088	0.089	0.082	0.081	0.083	0.087	0.089	0.09	0.086	0.088	0.093
04:30:06	4.5	0.088	0.087	0.089	0.085	0.088	0.086	0.088	0.088	0.089	0.082	0.081	0.083	0.086	0.089	0.09	0.086	0.088	0.093
05:00:06	5	0.088	0.087	0.09	0.085	0.088	0.086	0.087	0.088	0.089	0.082	0.081	0.083	0.086	0.09	0.09	0.085	0.088	0.093
05:30:06	5.5	0.088	0.088	0.089	0.085	0.088	0.086	0.087	0.088	0.088	0.082	0.081	0.082	0.086	0.09	0.09	0.086	0.088	0.094
06:00:06	6	0.089	0.088	0.09	0.085	0.088	0.087	0.088	0.088	0.089	0.081	0.081	0.083	0.086	0.09	0.089	0.086	0.088	0.094
06:30:06	6.5	0.089	0.089	0.09	0.085	0.088	0.087	0.088	0.088	0.089	0.082	0.081	0.083	0.087	0.09	0.089	0.087	0.089	0.094
07:00:06	7	0.089	0.089	0.091	0.085	0.088	0.086	0.088	0.088	0.089	0.081	0.081	0.082	0.086	0.09	0.089	0.087	0.089	0.094
07:30:06	7.5	0.09	0.089	0.092	0.085	0.088	0.086	0.088	0.088	0.09	0.082	0.081	0.083	0.086	0.091	0.09	0.087	0.09	0.095
08:00:06	8	0.09	0.09	0.092	0.085	0.088	0.086	0.088	0.088	0.089	0.082	0.081	0.083	0.087	0.09	0.09	0.088	0.09	0.095
08:30:06	8.5	0.091	0.09	0.092	0.085	0.088	0.087	0.088	0.089	0.09	0.082	0.081	0.083	0.087	0.09	0.09	0.088	0.091	0.096
09:00:06	9	0.092	0.091	0.093	0.085	0.088	0.086	0.088	0.088	0.089	0.081	0.081	0.082	0.087	0.09	0.09	0.089	0.091	0.097
09:30:06	9.5	0.093	0.092	0.093	0.085	0.088	0.086	0.088	0.088	0.09	0.081	0.081	0.082	0.086	0.09	0.09	0.09	0.093	0.098
10:00:06	10	0.094	0.093	0.095	0.085	0.088	0.086	0.089	0.089	0.09	0.082	0.081	0.082	0.087	0.09	0.091	0.092	0.094	0.099
10:30:06	10.5	0.095	0.095	0.096	0.085	0.088	0.086	0.089	0.089	0.09	0.082	0.081	0.083	0.087	0.09	0.091	0.093	0.095	0.101
11:00:06	11	0.097	0.097	0.097	0.085	0.088	0.086	0.089	0.089	0.09	0.082	0.081	0.082	0.087	0.09	0.091	0.095	0.097	0.102
11:30:06	11.5	0.099	0.099	0.1	0.085	0.088	0.086	0.089	0.09	0.09	0.082	0.081	0.083	0.087	0.09	0.091	0.098	0.099	0.105
12:00:06	12	0.101	0.102	0.102	0.085	0.088	0.086	0.089	0.09	0.09	0.082	0.081	0.082	0.087	0.089	0.09	0.102	0.102	0.107
12:30:06	12.5	0.104	0.106	0.105	0.085	0.089	0.086	0.09	0.09	0.09	0.082	0.081	0.083	0.087	0.09	0.091	0.105	0.105	0.109
13:00:06	13	0.108	0.111	0.108	0.085	0.088	0.086	0.09	0.091	0.09	0.082	0.081	0.083	0.088	0.091	0.091	0.11	0.108	0.113
13:30:06	13.5	0.112	0.118	0.113	0.085	0.088	0.086	0.09	0.091	0.091	0.082	0.081	0.083	0.087	0.091	0.091	0.115	0.113	0.117
14:00:06	14	0.117	0.125	0.119	0.085	0.088	0.086	0.09	0.092	0.091	0.082	0.081	0.083	0.087	0.091	0.091	0.122	0.118	0.122
14:30:06	14.5	0.123	0.135	0.126	0.085	0.089	0.086	0.09	0.092	0.091	0.081	0.081	0.083	0.087	0.091	0.092	0.13	0.125	0.128
15:00:06	15	0.131	0.146	0.134	0.085	0.089	0.086	0.091	0.092	0.091	0.081	0.081	0.083	0.087	0.091	0.091	0.14	0.134	0.135
15:30:06	15.5	0.141	0.162	0.144	0.085	0.088	0.086	0.092	0.093	0.091	0.082	0.081	0.083	0.087	0.092	0.092	0.153	0.143	0.142		Time hr	IBU	Benzoate	EtOH	Sulfite	Sorbate	Reference
16:00:06	16	0.151	0.179	0.156	0.086	0.089	0.086	0.092	0.093	0.092	0.082	0.081	0.083	0.087	0.091	0.093	0.169	0.156	0.151		0	0.088	0.0866667	0.089	0.083	0.0916667	0.0896667
16:30:06	16.5	0.163	0.197	0.172	0.085	0.089	0.086	0.092	0.093	0.092	0.082	0.081	0.083	0.088	0.092	0.092	0.181	0.168	0.16		0.5	0.0873333	0.0856667	0.0873333	0.082	0.0876667	0.0886667
17:00:06	17	0.176	0.217	0.19	0.085	0.089	0.086	0.093	0.094	0.091	0.081	0.081	0.083	0.088	0.091	0.091	0.194	0.183	0.173		1	0.087	0.0856667	0.087	0.082	0.0876667	0.0886667
17:30:06	17.5	0.192	0.24	0.208	0.085	0.089	0.086	0.093	0.094	0.091	0.081	0.081	0.082	0.088	0.091	0.091	0.215	0.198	0.186		1.5	0.087	0.0856667	0.0873333	0.082	0.088	0.0886667
18:00:06	18	0.21	0.262	0.229	0.086	0.089	0.086	0.094	0.095	0.091	0.082	0.081	0.082	0.087	0.092	0.092	0.24	0.215	0.199		2	0.0876667	0.0856667	0.0876667	0.082	0.0876667	0.0883333
18:30:06	18.5	0.229	0.287	0.252	0.086	0.089	0.086	0.094	0.096	0.092	0.081	0.081	0.083	0.087	0.092	0.092	0.266	0.233	0.216		2.5	0.0876667	0.0856667	0.088	0.082	0.088	0.0883333
19:00:06	19	0.248	0.318	0.279	0.085	0.089	0.086	0.095	0.097	0.092	0.082	0.081	0.083	0.087	0.092	0.092	0.295	0.255	0.236		3	0.0876667	0.0866667	0.088	0.082	0.088	0.0883333
19:30:06	19.5	0.274	0.353	0.31	0.086	0.089	0.086	0.096	0.097	0.092	0.082	0.081	0.083	0.088	0.092	0.092	0.32	0.28	0.255		3.5	0.0876667	0.086	0.0873333	0.0816667	0.088	0.0883333
20:00:06	20	0.302	0.393	0.342	0.086	0.089	0.086	0.097	0.098	0.092	0.082	0.081	0.083	0.087	0.091	0.092	0.368	0.309	0.281		4	0.088	0.0866667	0.088	0.082	0.0886667	0.089
20:30:06	20.5	0.339	0.439	0.378	0.086	0.089	0.086	0.098	0.099	0.092	0.082	0.081	0.083	0.087	0.091	0.092	0.407	0.343	0.307		4.5	0.088	0.0863333	0.0883333	0.082	0.0883333	0.089
21:00:06	21	0.371	0.489	0.418	0.085	0.089	0.086	0.099	0.1	0.093	0.082	0.081	0.083	0.088	0.091	0.092	0.444	0.375	0.335		5	0.0883333	0.0863333	0.088	0.082	0.0886667	0.0886667
21:30:06	21.5	0.417	0.543	0.464	0.086	0.089	0.086	0.1	0.102	0.094	0.082	0.081	0.083	0.088	0.09	0.093	0.499	0.419	0.366		5.5	0.0883333	0.0863333	0.0876667	0.0816667	0.0886667	0.0893333
22:00:06	22	0.462	0.606	0.513	0.086	0.089	0.086	0.101	0.103	0.094	0.082	0.081	0.083	0.088	0.091	0.092	0.553	0.459	0.403		6	0.089	0.0866667	0.0883333	0.0816667	0.0883333	0.0893333
22:30:06	22.5	0.514	0.671	0.566	0.085	0.089	0.086	0.103	0.104	0.094	0.082	0.081	0.083	0.088	0.092	0.093	0.606	0.498	0.437		6.5	0.0893333	0.0866667	0.0883333	0.082	0.0886667	0.09
23:00:06	23	0.573	0.746	0.622	0.086	0.089	0.086	0.105	0.106	0.094	0.082	0.081	0.083	0.088	0.091	0.093	0.67	0.553	0.473		7	0.0896667	0.0863333	0.0883333	0.0813333	0.0883333	0.09
23:30:06	23.5	0.624	0.821	0.686	0.085	0.089	0.086	0.106	0.107	0.095	0.082	0.081	0.083	0.088	0.091	0.092	0.746	0.604	0.521		7.5	0.0903333	0.0863333	0.0886667	0.082	0.089	0.0906667
01 00:00:06	24	0.692	0.898	0.757	0.086	0.089	0.086	0.109	0.11	0.094	0.082	0.081	0.083	0.088	0.092	0.093	0.811	0.66	0.569		8	0.0906667	0.0863333	0.0883333	0.082	0.089	0.091
01 00:30:06	24.5	0.758	0.981	0.832	0.086	0.089	0.086	0.111	0.112	0.094	0.082	0.081	0.083	0.088	0.092	0.093	0.895	0.721	0.617		8.5	0.091	0.0866667	0.089	0.082	0.089	0.0916667
01 01:00:06	25	0.831	1.065	0.903	0.086	0.089	0.086	0.114	0.113	0.095	0.082	0.081	0.083	0.089	0.093	0.093	0.956	0.78	0.665		9	0.092	0.0863333	0.0883333	0.0813333	0.089	0.0923333
01 01:30:06	25.5	0.904	1.146	0.981	0.086	0.089	0.086	0.116	0.116	0.096	0.082	0.081	0.083	0.088	0.093	0.093	1.04	0.847	0.721		9.5	0.0926667	0.0863333	0.0886667	0.0813333	0.0886667	0.0936667
01 02:00:06	26	0.979	1.226	1.068	0.086	0.089	0.086	0.12	0.118	0.097	0.082	0.081	0.083	0.088	0.093	0.093	1.128	0.921	0.784		10	0.094	0.0863333	0.0893333	0.0816667	0.0893333	0.095
01 02:30:06	26.5	1.071	1.303	1.148	0.086	0.09	0.086	0.123	0.121	0.096	0.082	0.081	0.083	0.09	0.093	0.093	1.179	1.004	0.841		10.5	0.0953333	0.0863333	0.0893333	0.082	0.0893333	0.0963333
01 03:00:06	27	1.134	1.366	1.231	0.086	0.089	0.086	0.126	0.125	0.097	0.082	0.081	0.083	0.09	0.093	0.093	1.257	1.084	0.909		11	0.097	0.0863333	0.0893333	0.0816667	0.0893333	0.098
01 03:30:06	27.5	1.212	1.42	1.303	0.086	0.089	0.086	0.13	0.128	0.097	0.082	0.081	0.083	0.089	0.093	0.093	1.338	1.172	0.999		11.5	0.0993333	0.0863333	0.0896667	0.082	0.0893333	0.100667
01 04:00:06	28	1.241	1.461	1.366	0.085	0.089	0.086	0.134	0.131	0.097	0.082	0.081	0.083	0.089	0.093	0.092	1.384	1.248	1.092		12	0.101667	0.0863333	0.0896667	0.0816667	0.0886667	0.103667
01 04:30:06	28.5	1.295	1.487	1.416	0.085	0.089	0.086	0.139	0.134	0.098	0.082	0.081	0.083	0.088	0.093	0.093	1.435	1.307	1.15		12.5	0.105	0.0866667	0.09	0.082	0.0893333	0.106333
01 05:00:06	29	1.332	1.503	1.452	0.086	0.09	0.086	0.144	0.139	0.099	0.082	0.081	0.083	0.089	0.093	0.093	1.445	1.347	1.226		13	0.109	0.0863333	0.0903333	0.082	0.09	0.110333
01 05:30:06	29.5	1.341	1.509	1.474	0.086	0.09	0.086	0.149	0.143	0.1	0.082	0.081	0.084	0.089	0.094	0.093	1.453	1.36	1.271		13.5	0.114333	0.0863333	0.0906667	0.082	0.0896667	0.115
01 06:00:06	30	1.353	1.513	1.488	0.086	0.089	0.086	0.153	0.148	0.1	0.082	0.081	0.083	0.089	0.094	0.093	1.459	1.372	1.301		14	0.120333	0.0863333	0.091	0.082	0.0896667	0.120667
01 06:30:06	30.5	1.358	1.516	1.489	0.086	0.09	0.086	0.159	0.152	0.101	0.082	0.081	0.084	0.089	0.093	0.093	1.464	1.382	1.315		14.5	0.128	0.0866667	0.091	0.0816667	0.09	0.127667
01 07:00:06	31	1.358	1.518	1.495	0.086	0.09	0.087	0.165	0.157	0.102	0.082	0.081	0.084	0.09	0.094	0.093	1.458	1.386	1.327		15	0.137	0.0866667	0.0913333	0.0816667	0.0896667	0.136333
01 07:30:06	31.5	1.363	1.518	1.494	0.086	0.09	0.086	0.171	0.162	0.102	0.082	0.081	0.084	0.089	0.094	0.093	1.463	1.391	1.34		15.5	0.149	0.0863333	0.092	0.082	0.0903333	0.146
01 08:00:06	32	1.372	1.519	1.498	0.086	0.09	0.086	0.177	0.169	0.103	0.082	0.081	0.084	0.088	0.094	0.094	1.471	1.395	1.341		16	0.162	0.087	0.0923333	0.082	0.0903333	0.158667
01 08:30:06	32.5	1.374	1.519	1.501	0.086	0.09	0.086	0.182	0.171	0.104	0.082	0.081	0.084	0.088	0.093	0.094	1.472	1.399	1.345		16.5	0.177333	0.0866667	0.0923333	0.082	0.0906667	0.169667
01 09:00:06	33	1.368	1.522	1.5	0.086	0.09	0.086	0.19	0.181	0.105	0.082	0.081	0.084	0.088	0.093	0.094	1.472	1.403	1.35		17	0.194333	0.0866667	0.0926667	0.0816667	0.09	0.183333
01 09:30:06	33.5	1.374	1.523	1.502	0.086	0.09	0.086	0.199	0.186	0.106	0.082	0.081	0.084	0.089	0.093	0.094	1.468	1.405	1.354		17.5	0.213333	0.0866667	0.0926667	0.0813333	0.09	0.199667
01 10:00:06	34	1.375	1.524	1.506	0.086	0.09	0.086	0.204	0.194	0.107	0.082	0.081	0.084	0.088	0.094	0.093	1.474	1.405	1.362		18	0.233667	0.087	0.0933333	0.0816667	0.0903333	0.218
01 10:30:06	34.5	1.378	1.525	1.505	0.086	0.09	0.086	0.214	0.199	0.108	0.082	0.082	0.084	0.089	0.094	0.094	1.465	1.406	1.36		18.5	0.256	0.087	0.094	0.0816667	0.0903333	0.238333
01 11:00:06	35	1.384	1.525	1.506	0.086	0.09	0.086	0.22	0.206	0.11	0.082	0.082	0.084	0.088	0.092	0.094	1.473	1.41	1.364		19	0.281667	0.0866667	0.0946667	0.082	0.0903333	0.262
01 11:30:06	35.5	1.387	1.527	1.508	0.086	0.09	0.086	0.227	0.212	0.111	0.083	0.081	0.084	0.088	0.093	0.093	1.471	1.411	1.368		19.5	0.312333	0.087	0.095	0.082	0.0906667	0.285
01 12:00:06	36	1.391	1.525	1.509	0.086	0.089	0.086	0.235	0.217	0.112	0.082	0.082	0.084	0.089	0.093	0.093	1.466	1.412	1.372		20	0.345667	0.087	0.0956667	0.082	0.09	0.319333
01 12:30:06	36.5	1.393	1.53	1.512	0.086	0.09	0.086	0.246	0.227	0.116	0.082	0.081	0.084	0.088	0.092	0.093	1.469	1.414	1.375		20.5	0.385333	0.087	0.0963333	0.082	0.09	0.352333
01 13:00:06	37	1.397	1.533	1.51	0.086	0.09	0.086	0.253	0.235	0.118	0.083	0.082	0.084	0.088	0.092	0.093	1.472	1.416	1.377		21	0.426	0.0866667	0.0973333	0.082	0.0903333	0.384667
01 13:30:06	37.5	1.397	1.537	1.514	0.086	0.09	0.086	0.267	0.249	0.12	0.082	0.081	0.084	0.088	0.093	0.094	1.471	1.415	1.376		21.5	0.474667	0.087	0.0986667	0.082	0.0903333	0.428
01 14:00:06	38	1.398	1.539	1.514	0.086	0.09	0.086	0.271	0.253	0.124	0.083	0.082	0.084	0.088	0.094	0.094	1.474	1.416	1.378		22	0.527	0.087	0.0993333	0.082	0.0903333	0.471667
01 14:30:06	38.5	1.403	1.542	1.524	0.086	0.09	0.086	0.286	0.264	0.126	0.083	0.081	0.084	0.088	0.093	0.094	1.471	1.418	1.38		22.5	0.583667	0.0866667	0.100333	0.082	0.091	0.513667
01 15:00:06	39	1.403	1.544	1.519	0.086	0.09	0.087	0.296	0.272	0.129	0.083	0.081	0.084	0.089	0.093	0.094	1.47	1.42	1.382		23	0.647	0.087	0.101667	0.082	0.0906667	0.565333
01 15:30:06	39.5	1.412	1.548	1.52	0.086	0.09	0.087	0.298	0.272	0.133	0.083	0.082	0.084	0.088	0.094	0.093	1.474	1.419	1.387		23.5	0.710333	0.0866667	0.102667	0.082	0.0903333	0.623667
01 16:00:06	40	1.413	1.55	1.521	0.086	0.09	0.087	0.316	0.299	0.137	0.083	0.081	0.084	0.088	0.094	0.094	1.476	1.422	1.388		24	0.782333	0.087	0.104333	0.082	0.091	0.68
01 16:30:06	40.5	1.416	1.554	1.528	0.086	0.09	0.086	0.333	0.303	0.141	0.083	0.081	0.084	0.088	0.094	0.093	1.476	1.423	1.388		24.5	0.857	0.087	0.105667	0.082	0.091	0.744333
01 17:00:06	41	1.423	1.556	1.526	0.086	0.09	0.087	0.341	0.299	0.144	0.083	0.082	0.084	0.088	0.093	0.093	1.475	1.426	1.39		25	0.933	0.087	0.107333	0.082	0.0916667	0.800333
01 17:30:06	41.5	1.426	1.56	1.529	0.086	0.09	0.087	0.345	0.315	0.148	0.083	0.082	0.085	0.088	0.094	0.094	1.477	1.426	1.393		25.5	1.01033	0.087	0.109333	0.082	0.0913333	0.869333
01 18:00:06	42	1.429	1.563	1.535	0.086	0.09	0.087	0.363	0.335	0.155	0.083	0.081	0.085	0.088	0.094	0.093	1.478	1.427	1.396		26	1.091	0.087	0.111667	0.082	0.0913333	0.944333
01 18:30:06	42.5	1.433	1.566	1.539	0.086	0.09	0.086	0.373	0.334	0.161	0.083	0.082	0.085	0.088	0.094	0.094	1.48	1.428	1.397		26.5	1.174	0.0873333	0.113333	0.082	0.092	1.008
01 19:00:06	43	1.44	1.57	1.543	0.086	0.09	0.086	0.381	0.347	0.167	0.083	0.081	0.085	0.088	0.094	0.093	1.479	1.428	1.399		27	1.24367	0.087	0.116	0.082	0.092	1.08333
01 19:30:06	43.5	1.441	1.572	1.543	0.086	0.09	0.087	0.406	0.361	0.179	0.083	0.081	0.085	0.088	0.093	0.093	1.479	1.432	1.402		27.5	1.31167	0.087	0.118333	0.082	0.0916667	1.16967
01 20:00:06	44	1.444	1.574	1.548	0.086	0.09	0.086	0.419	0.383	0.186	0.083	0.081	0.085	0.088	0.093	0.093	1.479	1.432	1.406		28	1.356	0.0866667	0.120667	0.082	0.0913333	1.24133
01 20:30:06	44.5	1.45	1.578	1.551	0.086	0.09	0.087	0.436	0.387	0.191	0.084	0.082	0.085	0.088	0.094	0.094	1.481	1.434	1.405		28.5	1.39933	0.0866667	0.123667	0.082	0.0913333	1.29733
01 21:00:06	45	1.454	1.581	1.554	0.086	0.09	0.087	0.449	0.387	0.202	0.084	0.082	0.086	0.088	0.094	0.093	1.481	1.434	1.407		29	1.429	0.0873333	0.127333	0.082	0.0916667	1.33933
01 21:30:06	45.5	1.453	1.583	1.554	0.086	0.091	0.087	0.468	0.413	0.206	0.084	0.081	0.086	0.089	0.094	0.093	1.478	1.437	1.411		29.5	1.44133	0.0873333	0.130667	0.0823333	0.092	1.36133
01 22:00:06	46	1.459	1.587	1.559	0.086	0.091	0.087	0.479	0.431	0.214	0.084	0.081	0.086	0.088	0.093	0.093	1.48	1.436	1.411		30	1.45133	0.087	0.133667	0.082	0.092	1.37733
01 22:30:06	46.5	1.461	1.588	1.558	0.086	0.091	0.087	0.501	0.434	0.228	0.084	0.082	0.086	0.089	0.094	0.093	1.48	1.438	1.414		30.5	1.45433	0.0873333	0.137333	0.0823333	0.0916667	1.387
01 23:00:06	47	1.469	1.593	1.561	0.087	0.091	0.088	0.521	0.453	0.236	0.084	0.082	0.086	0.089	0.095	0.093	1.483	1.439	1.415		31	1.457	0.0876667	0.141333	0.0823333	0.0923333	1.39033
01 23:30:06	47.5	1.467	1.595	1.564	0.086	0.091	0.087	0.536	0.46	0.236	0.085	0.082	0.087	0.091	0.094	0.093	1.474	1.44	1.414		31.5	1.45833	0.0873333	0.145	0.0823333	0.092	1.398
02 00:00:06	48	1.474	1.596	1.565	0.087	0.091	0.087	0.552	0.47	0.246	0.084	0.082	0.087	0.089	0.094	0.093	1.482	1.442	1.417		32	1.463	0.0873333	0.149667	0.0823333	0.092	1.40233
02 00:30:06	48.5	1.476	1.599	1.569	0.087	0.091	0.087	0.549	0.48	0.257	0.085	0.082	0.087	0.089	0.093	0.092	1.484	1.443	1.421		32.5	1.46467	0.0873333	0.152333	0.0823333	0.0916667	1.40533
02 01:00:06	49	1.478	1.602	1.571	0.087	0.091	0.087	0.564	0.508	0.27	0.085	0.082	0.088	0.089	0.094	0.094	1.483	1.445	1.42		33	1.46333	0.0873333	0.158667	0.0823333	0.0916667	1.40833
02 01:30:06	49.5	1.481	1.605	1.573	0.087	0.091	0.087	0.593	0.531	0.281	0.085	0.082	0.088	0.089	0.094	0.093	1.48	1.446	1.421		33.5	1.46633	0.0873333	0.163667	0.0823333	0.092	1.409
02 02:00:06	50	1.486	1.608	1.577	0.087	0.091	0.087	0.61	0.552	0.298	0.086	0.082	0.089	0.089	0.094	0.093	1.485	1.447	1.424		34	1.46833	0.0873333	0.168333	0.0823333	0.0916667	1.41367
02 02:30:06	50.5	1.489	1.61	1.579	0.087	0.091	0.088	0.601	0.56	0.306	0.086	0.082	0.089	0.089	0.091	0.093	1.485	1.453	1.429		34.5	1.46933	0.0873333	0.173667	0.0826667	0.0923333	1.41033
02 03:00:06	51	1.492	1.611	1.583	0.087	0.092	0.088	0.646	0.584	0.317	0.086	0.082	0.09	0.089	0.094	0.093	1.489	1.451	1.43		35	1.47167	0.0873333	0.178667	0.0826667	0.0913333	1.41567
02 03:30:06	51.5	1.492	1.614	1.584	0.087	0.092	0.088	0.651	0.601	0.327	0.087	0.082	0.091	0.089	0.093	0.092	1.488	1.452	1.431		35.5	1.474	0.0873333	0.183333	0.0826667	0.0913333	1.41667
02 04:00:06	52	1.499	1.617	1.589	0.087	0.092	0.088	0.663	0.625	0.341	0.087	0.082	0.091	0.089	0.093	0.092	1.491	1.454	1.433		36	1.475	0.087	0.188	0.0826667	0.0916667	1.41667
02 04:30:06	52.5	1.5	1.618	1.589	0.087	0.092	0.088	0.677	0.655	0.35	0.088	0.082	0.092	0.089	0.094	0.092	1.489	1.454	1.434		36.5	1.47833	0.0873333	0.196333	0.0823333	0.091	1.41933
02 05:00:06	53	1.501	1.622	1.592	0.087	0.092	0.088	0.677	0.669	0.359	0.088	0.083	0.093	0.089	0.093	0.092	1.491	1.458	1.437		37	1.48	0.0873333	0.202	0.083	0.091	1.42167
02 05:30:06	53.5	1.505	1.622	1.596	0.087	0.092	0.088	0.691	0.687	0.36	0.088	0.083	0.094	0.089	0.091	0.092	1.49	1.46	1.438		37.5	1.48267	0.0873333	0.212	0.0823333	0.0916667	1.42067
02 06:00:06	54	1.507	1.625	1.597	0.087	0.093	0.088	0.701	0.715	0.356	0.089	0.083	0.095	0.089	0.092	0.093	1.49	1.46	1.44		38	1.48367	0.0873333	0.216	0.083	0.092	1.42267
02 06:30:06	54.5	1.51	1.627	1.599	0.088	0.093	0.088	0.692	0.744	0.363	0.09	0.083	0.096	0.089	0.091	0.093	1.49	1.461	1.44		38.5	1.48967	0.0873333	0.225333	0.0826667	0.0916667	1.423
02 07:00:06	55	1.513	1.631	1.601	0.088	0.093	0.089	0.703	0.771	0.371	0.091	0.083	0.097	0.09	0.093	0.093	1.492	1.463	1.443		39	1.48867	0.0876667	0.232333	0.0826667	0.092	1.424
02 07:30:06	55.5	1.517	1.632	1.602	0.088	0.094	0.089	0.731	0.799	0.372	0.091	0.083	0.098	0.089	0.094	0.093	1.493	1.464	1.444		39.5	1.49333	0.0876667	0.234333	0.083	0.0916667	1.42667
02 08:00:06	56	1.519	1.634	1.607	0.088	0.094	0.089	0.722	0.808	0.384	0.092	0.084	0.1	0.09	0.092	0.093	1.494	1.466	1.448		40	1.49467	0.0876667	0.250667	0.0826667	0.092	1.42867
02 08:30:06	56.5	1.523	1.635	1.609	0.088	0.094	0.089	0.753	0.843	0.403	0.093	0.084	0.101	0.089	0.094	0.094	1.496	1.465	1.446		40.5	1.49933	0.0873333	0.259	0.0826667	0.0916667	1.429
02 09:00:06	57	1.525	1.636	1.61	0.088	0.095	0.089	0.736	0.855	0.396	0.094	0.084	0.103	0.09	0.093	0.094	1.496	1.468	1.448		41	1.50167	0.0876667	0.261333	0.083	0.0913333	1.43033
02 09:30:06	57.5	1.526	1.639	1.61	0.088	0.095	0.09	0.752	0.883	0.398	0.096	0.084	0.104	0.09	0.094	0.094	1.495	1.468	1.449		41.5	1.505	0.0876667	0.269333	0.0833333	0.092	1.432
02 10:00:06	58	1.53	1.64	1.614	0.089	0.095	0.089	0.753	0.907	0.406	0.096	0.084	0.105	0.09	0.093	0.093	1.496	1.47	1.452		42	1.509	0.0876667	0.284333	0.083	0.0916667	1.43367
02 10:30:06	58.5	1.535	1.643	1.618	0.089	0.096	0.09	0.735	0.92	0.408	0.097	0.085	0.106	0.09	0.092	0.094	1.499	1.472	1.453		42.5	1.51267	0.0873333	0.289333	0.0833333	0.092	1.435
02 11:00:06	59	1.534	1.643	1.617	0.089	0.096	0.09	0.768	0.945	0.415	0.099	0.085	0.109	0.089	0.094	0.093	1.497	1.473	1.453		43	1.51767	0.0873333	0.298333	0.083	0.0916667	1.43533
02 11:30:06	59.5	1.537	1.646	1.619	0.09	0.097	0.091	0.761	0.951	0.421	0.1	0.085	0.11	0.089	0.094	0.093	1.5	1.475	1.458		43.5	1.51867	0.0876667	0.315333	0.083	0.0913333	1.43767
02 12:00:06	60	1.54	1.646	1.62	0.09	0.098	0.091	0.781	0.963	0.423	0.101	0.086	0.111	0.09	0.093	0.093	1.501	1.475	1.458		44	1.522	0.0873333	0.329333	0.083	0.0913333	1.439
02 12:30:06	60.5	1.544	1.649	1.623	0.09	0.098	0.091	0.796	0.981	0.431	0.103	0.086	0.113	0.09	0.094	0.094	1.502	1.476	1.46		44.5	1.52633	0.0876667	0.338	0.0836667	0.092	1.44
02 13:00:06	61	1.546	1.65	1.625	0.091	0.099	0.092	0.782	0.987	0.435	0.104	0.087	0.115	0.09	0.093	0.093	1.504	1.478	1.461		45	1.52967	0.0876667	0.346	0.084	0.0916667	1.44067
02 13:30:06	61.5	1.546	1.652	1.626	0.091	0.1	0.092	0.77	0.988	0.437	0.106	0.088	0.116	0.089	0.093	0.093	1.503	1.48	1.462		45.5	1.53	0.088	0.362333	0.0836667	0.092	1.442
02 14:00:06	62	1.549	1.653	1.628	0.092	0.101	0.092	0.773	1.018	0.451	0.108	0.088	0.118	0.089	0.094	0.093	1.506	1.48	1.464		46	1.535	0.088	0.374667	0.0836667	0.0913333	1.44233
02 14:30:06	62.5	1.548	1.655	1.629	0.092	0.102	0.093	0.785	1.022	0.447	0.11	0.089	0.12	0.09	0.094	0.093	1.504	1.482	1.464		46.5	1.53567	0.088	0.387667	0.084	0.092	1.444
02 15:00:06	63	1.552	1.655	1.632	0.092	0.103	0.093	0.788	1.029	0.452	0.111	0.09	0.123	0.089	0.093	0.093	1.508	1.482	1.468		47	1.541	0.0886667	0.403333	0.084	0.0923333	1.44567
02 15:30:06	63.5	1.554	1.658	1.633	0.093	0.104	0.094	0.795	1.044	0.457	0.114	0.091	0.126	0.09	0.095	0.093	1.509	1.483	1.468		47.5	1.542	0.088	0.410667	0.0846667	0.0926667	1.44267
02 16:00:06	64	1.554	1.657	1.632	0.093	0.105	0.094	0.803	1.046	0.466	0.117	0.091	0.128	0.089	0.094	0.093	1.509	1.486	1.471		48	1.545	0.0883333	0.422667	0.0843333	0.092	1.447
02 16:30:06	64.5	1.557	1.659	1.634	0.094	0.106	0.095	0.806	1.056	0.465	0.119	0.092	0.131	0.089	0.094	0.093	1.509	1.487	1.471		48.5	1.548	0.0883333	0.428667	0.0846667	0.0913333	1.44933
02 17:00:06	65	1.559	1.661	1.638	0.095	0.108	0.096	0.826	1.059	0.473	0.123	0.093	0.134	0.09	0.094	0.092	1.509	1.488	1.473		49	1.55033	0.0883333	0.447333	0.085	0.0923333	1.44933
02 17:30:06	65.5	1.561	1.661	1.637	0.095	0.109	0.096	0.833	1.057	0.477	0.125	0.095	0.137	0.089	0.093	0.092	1.512	1.489	1.475		49.5	1.553	0.0883333	0.468333	0.085	0.092	1.449
02 18:00:06	66	1.562	1.663	1.64	0.096	0.111	0.097	0.803	1.065	0.486	0.126	0.096	0.142	0.089	0.092	0.093	1.514	1.491	1.477		50	1.557	0.0883333	0.486667	0.0856667	0.092	1.452
02 18:30:06	66.5	1.563	1.664	1.643	0.097	0.113	0.097	0.806	1.07	0.491	0.129	0.098	0.145	0.09	0.092	0.093	1.514	1.495	1.477		50.5	1.55933	0.0886667	0.489	0.0856667	0.091	1.45567
02 19:00:06	67	1.564	1.665	1.643	0.098	0.115	0.099	0.815	1.077	0.487	0.132	0.099	0.147	0.09	0.093	0.093	1.515	1.493	1.479		51	1.562	0.089	0.515667	0.086	0.092	1.45667
02 19:30:06	67.5	1.566	1.665	1.644	0.099	0.116	0.1	0.836	1.085	0.491	0.139	0.101	0.152	0.09	0.092	0.094	1.516	1.495	1.48		51.5	1.56333	0.089	0.526333	0.0866667	0.0913333	1.457
02 20:00:06	68	1.568	1.666	1.644	0.1	0.118	0.1	0.826	1.085	0.494	0.141	0.102	0.158	0.089	0.092	0.093	1.517	1.498	1.481		52	1.56833	0.089	0.543	0.0866667	0.0913333	1.45933
02 20:30:06	68.5	1.571	1.668	1.645	0.101	0.12	0.101	0.823	1.092	0.499	0.145	0.104	0.165	0.09	0.092	0.093	1.515	1.497	1.484		52.5	1.569	0.089	0.560667	0.0873333	0.0916667	1.459
02 21:00:06	69	1.573	1.668	1.645	0.102	0.123	0.103	0.868	1.105	0.504	0.154	0.106	0.169	0.089	0.093	0.094	1.519	1.498	1.484		53	1.57167	0.089	0.568333	0.088	0.0913333	1.462
02 21:30:06	69.5	1.573	1.669	1.65	0.103	0.126	0.103	0.856	1.099	0.517	0.158	0.108	0.177	0.09	0.092	0.094	1.52	1.5	1.487		53.5	1.57433	0.089	0.579333	0.0883333	0.0906667	1.46267
02 22:00:06	70	1.574	1.672	1.649	0.104	0.128	0.105	0.868	1.1	0.513	0.163	0.11	0.184	0.09	0.092	0.093	1.52	1.501	1.488		54	1.57633	0.0893333	0.590667	0.089	0.0913333	1.46333
02 22:30:06	70.5	1.575	1.671	1.651	0.105	0.132	0.106	0.855	1.113	0.517	0.17	0.112	0.191	0.09	0.093	0.094	1.518	1.502	1.488		54.5	1.57867	0.0896667	0.599667	0.0896667	0.091	1.46367
02 23:00:06	71	1.576	1.672	1.652	0.107	0.135	0.107	0.877	1.113	0.519	0.177	0.116	0.196	0.089	0.092	0.094	1.523	1.505	1.49		55	1.58167	0.09	0.615	0.0903333	0.092	1.466
02 23:30:06	71.5	1.578	1.672	1.651	0.109	0.138	0.108	0.854	1.117	0.527	0.185	0.119	0.208	0.09	0.093	0.094	1.522	1.506	1.492		55.5	1.58367	0.0903333	0.634	0.0906667	0.092	1.467
03 00:00:06	72	1.579	1.674	1.655	0.11	0.142	0.11	0.874	1.124	0.524	0.196	0.121	0.215	0.09	0.093	0.094	1.521	1.506	1.492		56	1.58667	0.0903333	0.638	0.092	0.0916667	1.46933
03 00:30:06	72.5	1.579	1.675	1.655	0.112	0.146	0.111	0.875	1.131	0.533	0.208	0.124	0.226	0.091	0.094	0.093	1.522	1.506	1.494		56.5	1.589	0.0903333	0.666333	0.0926667	0.0923333	1.469
03 01:00:06	73	1.58	1.675	1.653	0.114	0.15	0.113	0.912	1.131	0.562	0.223	0.128	0.239	0.089	0.094	0.094	1.525	1.508	1.496		57	1.59033	0.0906667	0.662333	0.0936667	0.0923333	1.47067
03 01:30:06	73.5	1.582	1.675	1.655	0.116	0.154	0.115	0.919	1.137	0.544	0.239	0.132	0.248	0.091	0.094	0.093	1.524	1.51	1.497		57.5	1.59167	0.091	0.677667	0.0946667	0.0926667	1.47067
03 02:00:06	74	1.581	1.674	1.654	0.117	0.159	0.116	0.911	1.134	0.54	0.254	0.135	0.262	0.09	0.094	0.093	1.524	1.509	1.498		58	1.59467	0.091	0.688667	0.095	0.092	1.47267
03 02:30:06	74.5	1.583	1.677	1.657	0.119	0.164	0.118	0.931	1.143	0.566	0.272	0.141	0.272	0.09	0.094	0.094	1.527	1.512	1.499		58.5	1.59867	0.0916667	0.687667	0.096	0.092	1.47467
03 03:00:06	75	1.583	1.677	1.656	0.121	0.17	0.12	0.894	1.144	0.562	0.286	0.147	0.284	0.09	0.093	0.093	1.526	1.514	1.5		59	1.598	0.0916667	0.709333	0.0976667	0.092	1.47433
03 03:30:06	75.5	1.584	1.679	1.659	0.124	0.175	0.122	0.902	1.15	0.566	0.308	0.152	0.3	0.09	0.093	0.094	1.528	1.515	1.504		59.5	1.60067	0.0926667	0.711	0.0983333	0.092	1.47767
03 04:00:06	76	1.584	1.678	1.661	0.126	0.183	0.124	0.911	1.146	0.566	0.334	0.16	0.313	0.09	0.092	0.094	1.53	1.517	1.503		60	1.602	0.093	0.722333	0.0993333	0.092	1.478
03 04:30:06	76.5	1.587	1.679	1.66	0.129	0.189	0.126	0.93	1.155	0.572	0.364	0.168	0.329	0.091	0.094	0.094	1.527	1.516	1.504		60.5	1.60533	0.093	0.736	0.100667	0.0926667	1.47933
03 05:00:06	77	1.587	1.679	1.658	0.132	0.197	0.129	0.948	1.159	0.578	0.398	0.178	0.349	0.09	0.095	0.093	1.53	1.517	1.505		61	1.607	0.094	0.734667	0.102	0.092	1.481
03 05:30:06	77.5	1.586	1.68	1.661	0.133	0.205	0.131	0.921	1.153	0.579	0.428	0.186	0.369	0.09	0.092	0.094	1.532	1.519	1.507		61.5	1.608	0.0943333	0.731667	0.103333	0.0916667	1.48167
03 06:00:06	78	1.589	1.68	1.663	0.137	0.213	0.133	0.937	1.161	0.588	0.477	0.198	0.397	0.09	0.094	0.094	1.531	1.52	1.509		62	1.61	0.095	0.747333	0.104667	0.092	1.48333
03 06:30:06	78.5	1.588	1.679	1.665	0.139	0.222	0.135	0.963	1.166	0.586	0.534	0.21	0.419	0.09	0.094	0.094	1.533	1.519	1.51		62.5	1.61067	0.0956667	0.751333	0.106333	0.0923333	1.48333
03 07:00:06	79	1.59	1.68	1.664	0.143	0.231	0.137	0.965	1.157	0.588	0.598	0.224	0.437	0.09	0.092	0.093	1.533	1.521	1.512		63	1.613	0.096	0.756333	0.108	0.0916667	1.486
03 07:30:06	79.5	1.591	1.679	1.66	0.146	0.242	0.141	0.951	1.17	0.597	0.669	0.24	0.472	0.09	0.093	0.093	1.535	1.522	1.513		63.5	1.615	0.097	0.765333	0.110333	0.0926667	1.48667
03 08:00:06	80	1.591	1.68	1.664	0.149	0.253	0.143	0.944	1.166	0.599	0.744	0.256	0.5	0.09	0.094	0.093	1.535	1.524	1.515		64	1.61433	0.0973333	0.771667	0.112	0.092	1.48867
03 08:30:06	80.5	1.591	1.681	1.663	0.153	0.265	0.148	0.974	1.174	0.617	0.842	0.275	0.531	0.09	0.093	0.093	1.537	1.525	1.515		64.5	1.61667	0.0983333	0.775667	0.114	0.092	1.489
03 09:00:06	81	1.59	1.684	1.666	0.155	0.279	0.149	0.973	1.18	0.606	0.947	0.296	0.567	0.09	0.095	0.093	1.535	1.525	1.514		65	1.61933	0.0996667	0.786	0.116667	0.092	1.49
03 09:30:06	81.5	1.593	1.681	1.664	0.161	0.293	0.153	0.967	1.177	0.622	1.073	0.32	0.616	0.09	0.093	0.093	1.539	1.527	1.516		65.5	1.61967	0.1	0.789	0.119	0.0913333	1.492
03 10:00:06	82	1.594	1.683	1.665	0.167	0.308	0.157	0.974	1.175	0.621	1.204	0.348	0.663	0.09	0.093	0.094	1.537	1.528	1.519		66	1.62167	0.101333	0.784667	0.121333	0.0913333	1.494
03 10:30:06	82.5	1.595	1.683	1.664	0.172	0.322	0.159	0.985	1.177	0.628	1.344	0.381	0.702	0.089	0.094	0.093	1.54	1.528	1.518		66.5	1.62333	0.102333	0.789	0.124	0.0916667	1.49533
03 11:00:06	83	1.596	1.683	1.666	0.176	0.338	0.162	0.982	1.178	0.643	1.449	0.416	0.737	0.09	0.092	0.094	1.539	1.532	1.52		67	1.624	0.104	0.793	0.126	0.092	1.49567
03 11:30:06	83.5	1.595	1.683	1.666	0.18	0.354	0.165	0.989	1.18	0.642	1.53	0.458	0.792	0.09	0.093	0.093	1.541	1.53	1.524		67.5	1.625	0.105	0.804	0.130667	0.092	1.497
03 12:00:06	84	1.596	1.683	1.665	0.187	0.372	0.17	0.989	1.187	0.651	1.584	0.502	0.844	0.09	0.093	0.093	1.54	1.532	1.521		68	1.626	0.106	0.801667	0.133667	0.0913333	1.49867
03 12:30:06	84.5	1.595	1.684	1.67	0.189	0.39	0.173	0.998	1.197	0.653	1.627	0.545	0.908	0.09	0.093	0.093	1.541	1.534	1.523		68.5	1.628	0.107333	0.804667	0.138	0.0916667	1.49867
03 13:00:06	85	1.595	1.684	1.667	0.198	0.408	0.177	1	1.19	0.664	1.656	0.594	0.935	0.089	0.095	0.093	1.541	1.534	1.525		69	1.62867	0.109333	0.825667	0.143	0.092	1.50033
03 13:30:06	85.5	1.596	1.686	1.667	0.203	0.427	0.182	1.02	1.2	0.667	1.679	0.645	0.994	0.09	0.093	0.094	1.541	1.535	1.526		69.5	1.63067	0.110667	0.824	0.147667	0.092	1.50233
03 14:00:06	86	1.596	1.685	1.669	0.212	0.448	0.184	1.031	1.196	0.656	1.691	0.694	1.02	0.09	0.093	0.093	1.543	1.537	1.527		70	1.63167	0.112333	0.827	0.152333	0.0916667	1.503
03 14:30:06	86.5	1.598	1.686	1.665	0.216	0.468	0.19	1.011	1.201	0.675	1.7	0.755	1.061	0.09	0.093	0.093	1.542	1.538	1.527		70.5	1.63233	0.114333	0.828333	0.157667	0.0923333	1.50267
03 15:00:06	87	1.597	1.686	1.671	0.222	0.486	0.194	1.017	1.204	0.679	1.705	0.826	1.103	0.09	0.093	0.092	1.543	1.539	1.53		71	1.63333	0.116333	0.836333	0.163	0.0916667	1.506
03 15:30:06	87.5	1.598	1.684	1.671	0.229	0.508	0.199	1.031	1.21	0.688	1.709	0.908	1.131	0.09	0.095	0.093	1.546	1.539	1.53		71.5	1.63367	0.118333	0.832667	0.170667	0.0923333	1.50667
03 16:00:06	88	1.598	1.687	1.671	0.239	0.53	0.2	1.05	1.214	0.69	1.709	0.997	1.142	0.09	0.092	0.093	1.545	1.541	1.53		72	1.636	0.120667	0.840667	0.177333	0.0923333	1.50633
03 16:30:06	88.5	1.597	1.686	1.67	0.242	0.545	0.205	1.053	1.222	0.718	1.706	1.098	1.147	0.09	0.092	0.093	1.546	1.542	1.532		72.5	1.63633	0.123	0.846333	0.186	0.0926667	1.50733
03 17:00:06	89	1.6	1.685	1.671	0.254	0.572	0.212	1.033	1.213	0.7	1.704	1.192	1.189	0.09	0.092	0.093	1.546	1.542	1.532		73	1.636	0.125667	0.868333	0.196667	0.0923333	1.50967
03 17:30:06	89.5	1.6	1.687	1.671	0.262	0.603	0.218	1.042	1.223	0.72	1.701	1.311	1.209	0.09	0.092	0.093	1.548	1.544	1.533		73.5	1.63733	0.128333	0.866667	0.206333	0.0926667	1.51033
03 18:00:06	90	1.599	1.686	1.671	0.27	0.626	0.225	1.041	1.217	0.718	1.698	1.419	1.228	0.09	0.092	0.093	1.548	1.545	1.535		74	1.63633	0.130667	0.861667	0.217	0.0923333	1.51033
03 18:30:06	90.5	1.599	1.685	1.67	0.282	0.659	0.23	1.05	1.225	0.759	1.696	1.503	1.21	0.09	0.092	0.093	1.548	1.544	1.536		74.5	1.639	0.133667	0.88	0.228333	0.0926667	1.51267
03 19:00:06	91	1.599	1.686	1.671	0.284	0.689	0.234	1.049	1.228	0.723	1.692	1.558	1.244	0.09	0.093	0.093	1.55	1.547	1.536		75	1.63867	0.137	0.866667	0.239	0.092	1.51333
03 19:30:06	91.5	1.598	1.686	1.673	0.29	0.735	0.24	1.061	1.226	0.726	1.689	1.59	1.272	0.09	0.093	0.093	1.549	1.545	1.538		75.5	1.64067	0.140333	0.872667	0.253333	0.0923333	1.51567
03 20:00:06	92	1.6	1.685	1.669	0.308	0.782	0.247	1.063	1.227	0.726	1.687	1.603	1.281	0.09	0.092	0.093	1.55	1.548	1.539		76	1.641	0.144333	0.874333	0.269	0.092	1.51667
03 20:30:06	92.5	1.602	1.684	1.672	0.319	0.799	0.252	1.059	1.229	0.743	1.686	1.614	1.283	0.09	0.093	0.093	1.552	1.549	1.539		76.5	1.642	0.148	0.885667	0.287	0.093	1.51567
03 21:00:06	93	1.602	1.685	1.673	0.327	0.869	0.259	1.077	1.24	0.739	1.684	1.617	1.3	0.09	0.092	0.093	1.549	1.549	1.54		77	1.64133	0.152667	0.895	0.308333	0.0926667	1.51733
03 21:30:06	93.5	1.602	1.686	1.672	0.34	0.917	0.264	1.071	1.237	0.747	1.681	1.616	1.305	0.09	0.092	0.093	1.552	1.551	1.542		77.5	1.64233	0.156333	0.884333	0.327667	0.092	1.51933
03 22:00:06	94	1.603	1.685	1.676	0.355	0.956	0.273	1.071	1.237	0.743	1.679	1.616	1.305	0.09	0.092	0.093	1.554	1.553	1.543		78	1.644	0.161	0.895333	0.357333	0.0926667	1.52
03 22:30:06	94.5	1.603	1.686	1.67	0.373	1.006	0.28	1.08	1.237	0.75	1.677	1.616	1.314	0.09	0.093	0.093	1.551	1.551	1.543		78.5	1.644	0.165333	0.905	0.387667	0.0926667	1.52067
03 23:00:06	95	1.603	1.685	1.672	0.387	1.056	0.289	1.077	1.238	0.762	1.674	1.613	1.315	0.09	0.092	0.093	1.553	1.552	1.545		79	1.64467	0.170333	0.903333	0.419667	0.0916667	1.522
03 23:30:06	95.5	1.604	1.685	1.672	0.395	1.099	0.294	1.089	1.24	0.769	1.673	1.611	1.319	0.09	0.091	0.092	1.554	1.553	1.546		79.5	1.64333	0.176333	0.906	0.460333	0.092	1.52333
04 00:00:06	96	1.602	1.684	1.672	0.409	1.146	0.304	1.088	1.24	0.769	1.67	1.61	1.325	0.09	0.092	0.092	1.553	1.554	1.546		80	1.645	0.181667	0.903	0.5	0.0923333	1.52467
04 00:30:06	96.5	1.603	1.684	1.671	0.441	1.194	0.313	1.087	1.241	0.786	1.667	1.608	1.325	0.09	0.092	0.093	1.555	1.556	1.548		80.5	1.645	0.188667	0.921667	0.549333	0.092	1.52567
04 01:00:06	97	1.603	1.685	1.673	0.466	1.244	0.321	1.103	1.266	0.804	1.667	1.608	1.325	0.09	0.093	0.093	1.555	1.554	1.549		81	1.64667	0.194333	0.919667	0.603333	0.0926667	1.52467
04 01:30:06	97.5	1.605	1.684	1.672	0.472	1.289	0.334	1.103	1.26	0.787	1.665	1.606	1.337	0.09	0.093	0.093	1.555	1.556	1.548		81.5	1.646	0.202333	0.922	0.669667	0.092	1.52733
04 02:00:06	98	1.603	1.685	1.671	0.496	1.334	0.341	1.103	1.271	0.807	1.664	1.604	1.341	0.09	0.092	0.093	1.557	1.557	1.549		82	1.64733	0.210667	0.923333	0.738333	0.0923333	1.528
04 02:30:06	98.5	1.606	1.684	1.672	0.523	1.377	0.352	1.108	1.263	0.853	1.661	1.601	1.318	0.09	0.094	0.093	1.557	1.557	1.55		82.5	1.64733	0.217667	0.93	0.809	0.092	1.52867
04 03:00:06	99	1.604	1.682	1.671	0.545	1.412	0.358	1.11	1.259	0.822	1.659	1.602	1.341	0.09	0.093	0.093	1.559	1.559	1.55		83	1.64833	0.225333	0.934333	0.867333	0.092	1.53033
04 03:30:06	99.5	1.604	1.682	1.669	0.569	1.441	0.371	1.112	1.264	0.83	1.66	1.599	1.336	0.09	0.092	0.093	1.558	1.558	1.551		83.5	1.648	0.233	0.937	0.926667	0.092	1.53167
04 04:00:06	100	1.605	1.682	1.672	0.583	1.463	0.378	1.114	1.267	0.849	1.658	1.597	1.334	0.09	0.092	0.093	1.559	1.559	1.552		84	1.648	0.243	0.942333	0.976667	0.092	1.531
04 04:30:06	100.5	1.605	1.683	1.67	0.609	1.48	0.394	1.128	1.271	0.824	1.655	1.595	1.348	0.09	0.093	0.093	1.555	1.559	1.552		84.5	1.64967	0.250667	0.949333	1.02667	0.092	1.53267
04 05:00:06	101	1.605	1.682	1.67	0.638	1.513	0.404	1.124	1.277	0.86	1.654	1.595	1.325	0.09	0.092	0.093	1.559	1.561	1.555		85	1.64867	0.261	0.951333	1.06167	0.0923333	1.53333
04 05:30:06	101.5	1.605	1.68	1.672	0.672	1.529	0.415	1.12	1.27	0.828	1.651	1.593	1.352	0.09	0.092	0.093	1.557	1.561	1.555		85.5	1.64967	0.270667	0.962333	1.106	0.0923333	1.534
04 06:00:06	102	1.606	1.682	1.67	0.724	1.542	0.422	1.13	1.265	0.817	1.653	1.594	1.362	0.09	0.093	0.093	1.558	1.562	1.556		86	1.65	0.281333	0.961	1.135	0.092	1.53567
04 06:30:06	102.5	1.605	1.682	1.67	0.751	1.553	0.437	1.133	1.279	0.822	1.652	1.592	1.36	0.09	0.094	0.093	1.556	1.563	1.555		86.5	1.64967	0.291333	0.962333	1.172	0.092	1.53567
04 07:00:06	103	1.605	1.681	1.672	0.79	1.564	0.454	1.148	1.276	0.848	1.651	1.592	1.357	0.09	0.093	0.093	1.56	1.565	1.557		87	1.65133	0.300667	0.966667	1.21133	0.0916667	1.53733
04 07:30:06	103.5	1.605	1.679	1.671	0.827	1.571	0.47	1.144	1.291	0.856	1.649	1.59	1.336	0.09	0.094	0.093	1.558	1.564	1.559		87.5	1.651	0.312	0.976333	1.24933	0.0926667	1.53833
04 08:00:06	104	1.605	1.677	1.67	0.85	1.582	0.488	1.15	1.278	0.843	1.646	1.589	1.355	0.09	0.094	0.093	1.558	1.563	1.559		88	1.652	0.323	0.984667	1.28267	0.0916667	1.53867
04 08:30:06	104.5	1.603	1.679	1.671	0.844	1.577	0.487	1.148	1.287	0.881	1.647	1.588	1.339	0.09	0.094	0.092	1.559	1.565	1.56		88.5	1.651	0.330667	0.997667	1.317	0.0916667	1.54
04 09:00:06	105	1.605	1.678	1.667	0.922	1.584	0.519	1.15	1.294	0.867	1.646	1.585	1.363	0.09	0.093	0.092	1.558	1.565	1.562		89	1.652	0.346	0.982	1.36167	0.0916667	1.54
04 09:30:06	105.5	1.605	1.677	1.668	0.978	1.591	0.534	1.147	1.286	0.831	1.646	1.585	1.364	0.09	0.093	0.092	1.558	1.566	1.56		89.5	1.65267	0.361	0.995	1.407	0.0916667	1.54167
04 10:00:06	106	1.605	1.676	1.667	1.022	1.594	0.537	1.15	1.285	0.849	1.645	1.586	1.361	0.09	0.093	0.092	1.56	1.566	1.562		90	1.652	0.373667	0.992	1.44833	0.0916667	1.54267
04 10:30:06	106.5	1.605	1.677	1.666	1.031	1.596	0.553	1.145	1.291	0.843	1.643	1.585	1.368	0.089	0.093	0.093	1.561	1.567	1.563		90.5	1.65133	0.390333	1.01133	1.46967	0.0916667	1.54267
04 11:00:06	107	1.606	1.674	1.668	1.038	1.596	0.568	1.148	1.295	0.854	1.642	1.585	1.366	0.09	0.093	0.093	1.56	1.569	1.564		91	1.652	0.402333	1	1.498	0.092	1.54433
04 11:30:06	107.5	1.606	1.676	1.667	1.066	1.6	0.581	1.148	1.292	0.841	1.643	1.584	1.371	0.09	0.092	0.093	1.561	1.567	1.565		91.5	1.65233	0.421667	1.00433	1.517	0.092	1.544
04 12:00:06	108	1.605	1.673	1.668	1.091	1.6	0.592	1.152	1.283	0.85	1.64	1.583	1.365	0.089	0.093	0.093	1.562	1.568	1.565		92	1.65133	0.445667	1.00533	1.52367	0.0916667	1.54567
04 12:30:06	108.5	1.606	1.674	1.666	1.11	1.6	0.617	1.194	1.286	0.844	1.641	1.582	1.353	0.091	0.095	0.092	1.559	1.568	1.567		92.5	1.65267	0.456667	1.01033	1.52767	0.092	1.54667
04 13:00:06	109	1.605	1.672	1.665	1.129	1.6	0.62	1.156	1.302	0.879	1.641	1.582	1.362	0.089	0.093	0.092	1.562	1.57	1.566		93	1.65333	0.485	1.01867	1.53367	0.0916667	1.546
04 13:30:06	109.5	1.607	1.671	1.664	1.141	1.602	0.633	1.157	1.299	0.86	1.64	1.582	1.378	0.089	0.094	0.093	1.563	1.571	1.567		93.5	1.65333	0.507	1.01833	1.534	0.0916667	1.54833
04 14:00:06	110	1.605	1.672	1.663	1.152	1.601	0.636	1.172	1.302	0.896	1.64	1.581	1.355	0.09	0.093	0.093	1.561	1.571	1.567		94	1.65467	0.528	1.017	1.53333	0.0916667	1.55
04 14:30:06	110.5	1.605	1.67	1.666	1.171	1.6	0.638	1.169	1.31	0.871	1.638	1.582	1.358	0.089	0.092	0.092	1.562	1.571	1.569		94.5	1.653	0.553	1.02233	1.53567	0.092	1.54833
04 15:00:06	111	1.606	1.669	1.663	1.159	1.601	0.646	1.17	1.3	0.872	1.638	1.581	1.369	0.09	0.093	0.093	1.563	1.571	1.569		95	1.65333	0.577333	1.02567	1.534	0.0916667	1.55
04 15:30:06	111.5	1.605	1.667	1.66	1.186	1.601	0.661	1.176	1.306	0.888	1.637	1.582	1.364	0.089	0.092	0.092	1.563	1.573	1.57		95.5	1.65367	0.596	1.03267	1.53433	0.091	1.551
04 16:00:06	112	1.604	1.667	1.663	1.208	1.6	0.663	1.173	1.313	0.876	1.638	1.581	1.374	0.089	0.092	0.093	1.563	1.573	1.57		96	1.65267	0.619667	1.03233	1.535	0.0913333	1.551
04 16:30:06	112.5	1.604	1.668	1.663	1.206	1.598	0.656	1.179	1.309	0.875	1.638	1.581	1.383	0.089	0.092	0.092	1.566	1.573	1.571		96.5	1.65267	0.649333	1.038	1.53333	0.0916667	1.553
04 17:00:06	113	1.604	1.667	1.663	1.2	1.599	0.663	1.206	1.312	0.885	1.637	1.581	1.379	0.089	0.092	0.093	1.565	1.574	1.573		97	1.65367	0.677	1.05767	1.53333	0.092	1.55267
04 17:30:06	113.5	1.603	1.665	1.66	1.216	1.595	0.661	1.185	1.315	0.892	1.639	1.579	1.384	0.089	0.092	0.093	1.566	1.576	1.573		97.5	1.65367	0.698333	1.05	1.536	0.092	1.553
04 18:00:06	114	1.604	1.665	1.659	1.209	1.594	0.677	1.177	1.311	0.887	1.639	1.58	1.382	0.089	0.092	0.093	1.566	1.576	1.575		98	1.653	0.723667	1.06033	1.53633	0.0916667	1.55433
04 18:30:06	114.5	1.605	1.663	1.657	1.213	1.595	0.682	1.182	1.312	0.908	1.639	1.579	1.374	0.089	0.093	0.092	1.565	1.576	1.574		98.5	1.654	0.750667	1.07467	1.52667	0.0923333	1.55467
04 19:00:06	115	1.605	1.662	1.657	1.237	1.593	0.673	1.184	1.316	0.923	1.637	1.579	1.363	0.089	0.092	0.092	1.567	1.577	1.576		99	1.65233	0.771667	1.06367	1.534	0.092	1.556
04 19:30:06	115.5	1.605	1.661	1.657	1.241	1.59	0.676	1.186	1.323	0.919	1.637	1.58	1.371	0.089	0.092	0.093	1.566	1.576	1.576		99.5	1.65167	0.793667	1.06867	1.53167	0.0916667	1.55567
04 20:00:06	116	1.603	1.661	1.659	1.237	1.591	0.68	1.197	1.328	0.902	1.641	1.581	1.385	0.089	0.094	0.093	1.567	1.577	1.578		100	1.653	0.808	1.07667	1.52967	0.0916667	1.55667
04 20:30:06	116.5	1.605	1.662	1.66	1.238	1.586	0.683	1.191	1.325	0.932	1.638	1.58	1.374	0.089	0.092	0.093	1.567	1.576	1.577		100.5	1.65267	0.827667	1.07433	1.53267	0.092	1.55533
04 21:00:06	117	1.605	1.659	1.655	1.25	1.585	0.674	1.192	1.328	0.925	1.637	1.581	1.37	0.089	0.092	0.092	1.567	1.578	1.579		101	1.65233	0.851667	1.087	1.52467	0.0916667	1.55833
04 21:30:06	117.5	1.601	1.658	1.659	1.248	1.582	0.693	1.218	1.325	0.924	1.638	1.583	1.373	0.089	0.092	0.092	1.565	1.578	1.579		101.5	1.65233	0.872	1.07267	1.532	0.0916667	1.55767
04 22:00:06	118	1.602	1.658	1.657	1.252	1.583	0.691	1.201	1.334	0.927	1.638	1.581	1.389	0.089	0.092	0.093	1.567	1.579	1.58		102	1.65267	0.896	1.07067	1.53633	0.092	1.55867
04 22:30:06	118.5	1.602	1.658	1.654	1.254	1.579	0.676	1.2	1.326	0.943	1.637	1.582	1.367	0.089	0.092	0.093	1.567	1.579	1.58		102.5	1.65233	0.913667	1.078	1.53467	0.0923333	1.558
04 23:00:06	119	1.603	1.657	1.652	1.245	1.576	0.679	1.2	1.326	0.928	1.638	1.583	1.378	0.089	0.092	0.093	1.567	1.579	1.581		103	1.65267	0.936	1.09067	1.53333	0.092	1.56067
04 23:30:06	119.5	1.602	1.655	1.652	1.244	1.577	0.681	1.2	1.332	0.928	1.638	1.581	1.393	0.089	0.092	0.092	1.568	1.581	1.58		103.5	1.65167	0.956	1.097	1.525	0.0923333	1.56033
05 00:00:06	120	1.603	1.654	1.65	1.252	1.577	0.691	1.202	1.328	0.925	1.639	1.582	1.388	0.089	0.093	0.092	1.569	1.581	1.582		104	1.65067	0.973333	1.09033	1.53	0.0923333	1.56
		2	12	22	7	17	27	32	42	52	37	47	57	62	72	82	67	77	87		104.5	1.651	0.969333	1.10533	1.52467	0.092	1.56133
																					105	1.65	1.00833	1.10367	1.53133	0.0916667	1.56167
																					105.5	1.65	1.03433	1.088	1.53167	0.0916667	1.56133
																					106	1.64933	1.051	1.09467	1.53067	0.0916667	1.56267
																					106.5	1.64933	1.06	1.093	1.532	0.0916667	1.56367
																					107	1.64933	1.06733	1.099	1.531	0.092	1.56433
																					107.5	1.64967	1.08233	1.09367	1.53267	0.0916667	1.56433
																					108	1.64867	1.09433	1.095	1.52933	0.0916667	1.565
																					108.5	1.64867	1.109	1.108	1.52533	0.0926667	1.56467
																					109	1.64733	1.11633	1.11233	1.52833	0.0913333	1.566
																					109.5	1.64733	1.12533	1.10533	1.53333	0.092	1.567
																					110	1.64667	1.12967	1.12333	1.52533	0.092	1.56633
																					110.5	1.647	1.13633	1.11667	1.526	0.091	1.56733
																					111	1.646	1.13533	1.114	1.52933	0.092	1.56767
																					111.5	1.644	1.14933	1.12333	1.52767	0.091	1.56867
																					112	1.64467	1.157	1.12067	1.531	0.0913333	1.56867
																					112.5	1.645	1.15333	1.121	1.534	0.091	1.57
																					113	1.64467	1.154	1.13433	1.53233	0.0913333	1.57067
																					113.5	1.64267	1.15733	1.13067	1.534	0.0913333	1.57167
																					114	1.64267	1.16	1.125	1.53367	0.0913333	1.57233
																					114.5	1.64167	1.16333	1.134	1.53067	0.0913333	1.57167
																					115	1.64133	1.16767	1.141	1.52633	0.091	1.57333
																					115.5	1.641	1.169	1.14267	1.52933	0.0913333	1.57267
																					116	1.641	1.16933	1.14233	1.53567	0.092	1.574
																					116.5	1.64233	1.169	1.14933	1.53067	0.0913333	1.57333
																					117	1.63967	1.16967	1.14833	1.52933	0.091	1.57467
																					117.5	1.63933	1.17433	1.15567	1.53133	0.091	1.574
																					118	1.639	1.17533	1.154	1.536	0.0913333	1.57533
																					118.5	1.638	1.16967	1.15633	1.52867	0.0913333	1.57533
																					119	1.63733	1.16667	1.15133	1.533	0.0913333	1.57567
																					119.5	1.63633	1.16733	1.15333	1.53733	0.091	1.57633
																					120	1.63567	1.17333	1.15167	1.53633	0.0913333	1.57733

## Sheet: Supplementary Material
Brewing Characteristics of the Maltotriose-Positive Yeast Zygotorulaspora florentina Isolated from Oak - Supplementary material
S1	Screening fermentation results with volatile aroma compounds
	100 mL				2L-scale					2L-scale
	Sample at	15C	25C		Sample name	Z. flo 7	Z. flo 8	A-165		Sample name	Z. flo	+ / -	A-165
	ABV %	3.73	3.525		ABV %	3.51	3.49	3.2		ABV %	3.5	0.0141421	3.2
	°Plato	1.2805	1.694		°Plato	1.396	1.429	2.022		°Plato	1.4125	0.0233345	2.022
	pH	4.405	4.44		pH Value	4.41	4.25	4.43		pH Value	4.33	0.113137	4.43
	Attenuation	0.846647	0.797126		Attenuation %	0.828501	0.825156	0.7512		Attenuation	0.826829	0.00236543	0.7512
	(mg/L)	15C	25C		(mg/L)					(mg/L)					Thresholds
	Acetaldehyde	18.6453	9.42608		Acetaldehyde	7.70892	8.02976	14.2498		Acetaldehyde	7.86934	0.226875	14.2498		25
	Propanol	6.03052	7.97919		Propanol	9.41279	9.82477	13.2061		Propanol	9.61878	0.29131	13.2061		800
	Ethylacetate	14.3629	9.94318		Ethylacetate	16.6288	17.0742	22.8398		Ethylacetate	16.8515	0.314974	22.8398		33
	2-methyl-propanol	12.3442	14.2793		2-methyl-propanol	15.9024	16.7618	9.9356		2-methyl-propanol	16.3321	0.607645	9.9356		200
	3-methyl-butanol	22.2257	34.8797		3-methyl-butanol	28.4682	29.1092	29.4684		3-methyl-butanol	28.7887	0.453305	29.4684		70
	2-methyl-butanol	7.04973	9.07076		2-methyl-butanol	7.37437	7.40822	13.0002		2-methyl-butanol	7.39129	0.0239356	13.0002		65
	2-phenylethanol	5.63468	12.3583		3-methylbutyl acetate	0.017985	0.020095	1.25022		3-methylbutyl acetate	0.01904	0.001492	1.25022		1.1
	Phenylethylacetate	1.31388	1.97808		Ethylcaproate	0.028705	0.029915	0.152985		Ethylcaproate	0.02931	0.000855599	0.152985		0.2
					2-phenylethanol	7.21508	6.96241	9.80846		2-phenylethanol	7.08875	0.178665	9.80846		125
					Ethylcaprylate	0.02789	0.032185	0.20745		Ethylcaprylate	0.0300375	0.00303702	0.20745		0.5
					2-phenylethyl acetate	2.22961	3.02808	0.30443		2-phenylethyl acetate	2.62885	0.564611	0.30443		3.8
					Ethyldecanoate	0.04402	0.104555	0.124535		Ethyldecanoate	0.0742875	0.0428047	0.124535		1.5
S2	Flavor descriptors used in sensory analysis
	tropical fruity									spicy
	Banana (green)	Banana (ripe)	Pineapple	Passionfruit	Peach	Mango	Melon			Clove	Juniper	Pepper	Cinnamon
	fruity									sweet
	Berry	Strawberry	Red currant	Apple (green)	Apple (ripe)	Plum				Malty	Wortlike, sweet	Honey	Toffee	Bitter almond, marzipan	Vanilla	Gummy bear	Chocolatey
	citrus									Floral
	Orange	Tangerine	Lemon	Grapefruit	Lime					Floral	Green gras	Herbs	Resinous
	other
	Yeasty	Sulfurous	Phenolic off	Rotten egg	Buttry (Diacetyl)	Swaety, cheesy	Fungoid, forrest floor	Solvent like	Alcoholic	Vinous	Smoky
S3	Individual curves for BioScreen runs
